# Supplementary material for: Age-Dependent Inflammatory Microenvironment Mediates Alveolar Regeneration
Source: MDPI journal article supplement (doi:10.3390/ijms25063476), 2024-03-20
Supplement: s1 [file s1]

## Supplementary Materials

**Table S1. Antibody information for immunofluorescence staining experiment.**

| Antibodies                                        | Source                   | Identifier | Host   |
|---------------------------------------------------|--------------------------|------------|--------|
| Anti-Prosurfactant protein C/Prospc antibody      | abcam                    | ab90716    | Rabbit |
| Aquaporin 5/Aqp5 antibody                         | Santa Cruz Biotechnology | sc-514022  | Mouse  |
| Recombinant Anti-Ki67 antibody                    | abcam                    | ab279653   | Mouse  |
| Alexa Fluor 488-labeled Goat Anti-Mouse IgG(H+L)  | abcam                    | A0428      | -      |
| Alexa Fluor 647-labeled Goat Anti-Rabbit IgG(H+L) | abcam                    | A0468      | -      |

**Table S2. Primer sequences for mouse-specific genes used in our experiment.**

| Gene          | Forward Primer (5' to 3') | Reverse Primer (5' to 3') |
|---------------|---------------------------|---------------------------|
| <i>Gapdh</i>  | TGGCCTTCCGTGTTCTAC        | GAGTTGCTGTTGAAGTCGA       |
| <i>Aqp5</i>   | AGAAGGAGGTGTGTTTCAGTTGC   | TAATGGCCGGATTGATGTGGC     |
| <i>Hopx</i>   | ATACTGTCCCCTCGGAGTGT      | GTGCGCGTCTGACTAAGGAT      |
| <i>Pdpm</i>   | GTTTTGGGGAGCGTTTGGTTC     | CATTAAGCCCTCCAGTAGCAC     |
| <i>Igfbp2</i> | CAGACGCTACGCTGCTATCC      | CCCTCAGAGTGGTCGTCATCA     |
| <i>Sftpb</i>  | TGAACAGGCTATGCCACAGG      | GACCGCGTTCTCAGAGGTG       |
| <i>Sftpc</i>  | CATGGGCCTCCACATGAGTC      | GCTTATAGGCCGTCAGGAGC      |
| <i>Sftpd</i>  | ACGTGGACTAAGTGGACCTCC     | CCTTTTGCCCCGTGTAGATCCTT   |

**Table S3. Primer sequences for human-specific genes used in our experiment.**

| Gene           | Forward Primer (5' to 3') | Reverse Primer (5' to 3') |
|----------------|---------------------------|---------------------------|
| <i>GAPDH</i>   | GGAGCGAGATCCCTCCAAAAT     | GGCTGTTGTCATACTTCTCATGG   |
| <i>CTNNB1</i>  | CATCTACACAGTTTGTATGCTGCT  | GCAGTTTTGTCTAGTTCAGGGA    |
| <i>MYC</i>     | TTCATAACGCGCTCTCCAAGTA    | TCAAGAGTCCCAGGGAGAGT      |
| <i>MKI67</i>   | ACGCCTGGTTACTATCAAAAGG    | CAGACCCATTTACTTGTGTTGGA   |
| <i>PCNA</i>    | GCCTGACAAATGCTTGCTGAC     | TTGATGAGGTCCTTGAGTGCC     |
| <i>CCND3</i>   | CCGAAACTTGGCTGAGCAGA      | GTGTTTACAAAGTCCGCGCC      |
| <i>NOTCH2</i>  | GGTGGATACAGATGCGAGTGT     | CTTAAGACAATGCCCTGGATGG    |
| <i>JAG1</i>    | TCACGGGAAGTGCAAGAGTC      | GTTTCACAGTAGGCCCTCTC      |
| <i>HES1</i>    | AAGAAAGATAGCTCGCGCA       | CCTCGGTATTAACGCCCTCG      |
| <i>TGFBR1</i>  | ACGGCGTTACAGTGTTTCTG      | GCACATACAAACGGCCTATCTC    |
| <i>TGFBR2</i>  | GTGCTCTGTGGGTACCTTGA      | GCGCTGGGTTGGAGATGTTA      |
| <i>TGFBI</i>   | AGGCCTTCGAGAAGATCCCT      | GAGATGATCGCCTTCCCGTT      |
| <i>BMPRI1A</i> | CCTGTTGTCATAGGTCCGTTTT    | ATCCTGTTCCAAATCACGATTGT   |
| <i>BMPRI2</i>  | CACTCAGTCCACCTCATTCATT    | TTGTTTACGGTCTCCTGTCAAC    |
| <i>BMP2</i>    | TCCTAAGGAGGACGACAGCA      | TGGGGTGCAGCAAGTTATTCT     |

|              |                           |                           |
|--------------|---------------------------|---------------------------|
| <i>BMP4</i>  | CTAGGTGAGTGTGGCATCCG      | ACGACCATCAGCATTCCGGTT     |
| <i>FST</i>   | GTGTATCAAAGCAAAGTCCTGTGAA | GCTCAGGTTTTACGGGCAGA      |
| <i>FSTL1</i> | ACCCACCTGTCTCTGCATTG      | AGCTCATCACGGTTGGACTG      |
| <i>IL8</i>   | TCTGCAGCTCTGTGTGAAGG      | TTCTCAGCCCTCTTCAAAAAC TTC |
| <i>IL11</i>  | CATGAACTGTGTTTGCCGCC      | GGAATCCAGGTTGTGGTCCC      |
| <i>IL18</i>  | ATCGCTTCCTCTCGCAACAA      | GAGGCCGATTTCCCTGGTCA      |
| <i>IL1B</i>  | AGCTACGAATCTCCGACCAC      | CGTTATCCCATGTGTGCGAAGAA   |
| <i>CCL2</i>  | CCTTCATTCCCCAAGGGCTC      | GGTTTGCTTGTCAGGTGGT       |
| <i>CSF2</i>  | GAGACACTGCTGCTGAGATGA     | AGGGCAGTGCTGCTTGTAG       |

**Table S4. Antibody information for Western blot analysis in our experiment.**

| Antibodies                                         | Source      | Identifier | Host   | Dilution |
|----------------------------------------------------|-------------|------------|--------|----------|
| Recombinant anti-alpha tubulin antibody            | abcam       | ab52866    | Rabbit | 1:2500   |
| SFTPC antibody                                     | GeneTex     | GTX134340  | Rabbit | 1:1000   |
| Anti-Aquaporin 5 (Aqp5) antibody                   | abcam       | ab78486    | Rabbit | 1:10000  |
| Anti-HOPX antibody                                 | abcam       | ab195974   | Rabbit | 1:1000   |
| Recombinant anti-RAGE antibody                     | abcam       | ab181293   | Rabbit | 1:5000   |
| P53 Monoclonal antibody                            | proteintech | 60283-2-Ig | Mouse  | 1:7000   |
| P21 Polyclonal antibody                            | proteintech | 27296-1-AP | Rabbit | 1:600    |
| Recombinant anti-Cyclin B1 antibody                | abcam       | ab181593   | Rabbit | 1:2000   |
| Recombinant anti-Histone H3 (phospho S10) antibody | abcam       | ab267372   | Rabbit | 1:1000   |
| HRP-labeled Goat Anti-Rabbit IgG(H+L)              | Beyotime    | A0208      | -      | 1:1000   |
| HRP-labeled Goat Anti-Mouse IgG(H+L)               | Beyotime    | A0216      | -      | 1:1000   |
